# Supplementary material for: Screening of Eurasian Tundra Reindeer for Viral Sequences by Next-Generation Sequencing
Source: MDPI journal article supplement (doi:10.3390/ijerph18126561), 2021-06-18
Supplement: s1 [file s1]

**Supplementary Table S1.** Viral Blastn hits from rectal swabs collected from semi-domesticated Eurasian tundra reindeer in Sweden during late autumn 2016. Reindeer were sampled in herds from three regions (A, B, C).

| Virus                           | Region A 08-11-2016 |               |            | Region B 06-12-2016 |               |            | Region C 01-11-2016 |               |            |
|---------------------------------|---------------------|---------------|------------|---------------------|---------------|------------|---------------------|---------------|------------|
|                                 | Pools               | e-value (min) | Read count | Pools               | e-value (min) | Read count | Pools               | e-value (min) | Read count |
| <i>Arenaviridae</i>             | 6/6                 |               |            | 3/3                 |               |            | 4/4                 |               |            |
| Guanarito mammarenavirus        | 6/6                 | 4E-54-2E-50   | 100-866    | 3/3                 | 2E-52-7E-51   | 105-398    | 4/4                 | 1E-50-4E-49   | 13-180     |
| Lassa mammarenavirus            | 6/6                 | 6E-80-3E-59   | 15-109     | 3/3                 | 1E-73-2E-59   | 16-36      | 3/4                 | 8E-69-1E-61   | 5-75       |
| <i>Astroviridae</i>             |                     |               |            |                     |               |            |                     |               |            |
| Bovine astrovirus               |                     |               |            |                     |               |            | 2/4                 | 1E-59-5E-52   | 2          |
| Water buffalo astrovirus        |                     |               |            |                     |               |            | 1/4                 | 1,00E-48      | 1          |
| <i>Flaviviridae</i>             |                     |               |            | 1/3                 |               |            | 1/4                 |               |            |
| Iguape virus                    | 4/6                 | 1E-56-2E-43   | 3-10       | 1/3                 | 2,00E-32      | 3          | 1/4                 | 3,00E-27      | 3          |
| Dengue virus                    | 1/6                 | 3,00E-10      | 2          | 1/3                 | 4,00E-09      | 2          |                     |               |            |
| Bovine viral diarrhea virus     | 1/6                 | 5,00E-15      | 1          |                     |               |            |                     |               |            |
| <i>Herpesviridae</i>            |                     |               |            |                     |               |            |                     |               |            |
| <i>Alphaherpesviridae</i>       | 1/6                 |               |            |                     |               |            |                     |               |            |
| Felid herpesvirus 1             |                     |               |            |                     |               |            | 1/4                 | 2,00E-06      | 1          |
| Mule deer alphaherpesvirus      | 1/6                 | 7,00E-12      |            |                     |               |            | 2/4                 | 6E-13-1E-11   | 2          |
| Suid herpesvirus 1              |                     |               |            |                     |               |            |                     |               |            |
| <i>Gammaherpesviridae</i>       |                     |               |            |                     |               |            |                     |               |            |
| Human herpesvirus 4             | 2/6                 | 9,00E-07      |            |                     |               |            |                     |               |            |
| Ovine/caprine herpesvirus 2     | 2/6                 | 5E-15-9E-6    |            |                     |               |            |                     |               |            |
| <i>Papillomaviridae</i>         |                     |               |            |                     |               |            |                     |               |            |
| Bovine papillomavirus           | 2/6                 | 2E-36-7E-15   | 2-4        |                     |               |            |                     |               |            |
| Human papillomavirus type 115   | 1/6                 | 4,00E-28      | 2          |                     |               |            |                     |               |            |
| Pudu puda papillomavirus type 1 | 1/6                 | 5,00E-78      | 1          |                     |               |            |                     |               |            |
| <i>Paramyxoviridae</i>          | 1/6                 |               |            | 1/3                 |               |            | 1/4                 |               |            |
| Human Respirivirus 1            | 1/6                 | 9,00E-24      | 2          | 1/3                 | 2,00E-26      | 2          | 1/4                 | 2,00E-48      | 2          |
| <i>Parvoviridae</i>             |                     |               |            |                     |               |            | 1/4                 |               |            |
| Red-crowned crane parvovirus    | 4/6                 | 2E-13-1E-10   | 28-41      |                     |               |            | 1/4                 | 3,00E-11      | 21         |
| Canine bocavirus 3              | 1/6                 | 7,00E-32      | 13         |                     |               |            |                     |               |            |
| Bat parvovirus                  | 1/6                 | 1,00E-22      | 10         |                     |               |            |                     |               |            |
| Bat bocavirus                   | 1/6                 | 3,00E-55      | 8          |                     |               |            |                     |               |            |
| Camel bocavirus 3               | 1/6                 | 1,00E-35      | 7          |                     |               |            |                     |               |            |
| Murine bocavirus                | 1/6                 | 8,00E-21      | 8          |                     |               |            |                     |               |            |
| <i>Peribunyaviridae</i>         | 2/6                 |               |            |                     |               |            | 1/4                 |               |            |
| Orthobunyavirus sp.             | 2/6                 | 1E-23-1E-22   | 2          |                     |               |            | 1/4                 | 1,00E-22      | 2          |
| <i>Picornaviridae</i>           | 1/6                 |               |            |                     |               |            | 1/4                 |               |            |
| Human Rhinovirus A              | 1/6                 | 9,00E-51      | 2          |                     |               |            |                     |               |            |
| Porcine kobuvirus               |                     |               |            |                     |               |            | 1/4                 | 5,00E-78      | 6          |
| Sheep kobuvirus                 |                     |               |            |                     |               |            | 1/4                 | 2,00E-19      | 2          |

|                   |   |             |     |
|-------------------|---|-------------|-----|
| <i>Poxviridae</i> |   |             |     |
| Orf virus         | - | 1E-50-6E-11 | 2-4 |

**Supplementary Table S2.** Viral blastn hits from rectal swabs collected from semi-domesticated Eurasian tundra reindeer herds in Sweden during late autumn 2017. Reindeer were sampled in herds from three regions (A, B, C).

| Virus                             | Region A 08-12-2017 |               |            | Region B 08-12-2017 |               |            | Region C 16-11-2017 |               |            |
|-----------------------------------|---------------------|---------------|------------|---------------------|---------------|------------|---------------------|---------------|------------|
|                                   | Pools               | e-value (min) | Read count | Pools               | e-value (min) | Read count | Pools               | e-value (min) | Read count |
| <i>Arenaviridae</i>               |                     |               |            |                     |               |            | 3/3                 |               |            |
| Lassa mammarenavirus              |                     |               |            | 3/4                 | 4E-48-2E-13   | 90-193     | 3/3                 | 1E-78-4E-76   | 24-163     |
| Guanarito mammarenavirus virus    |                     |               |            | 1/4                 | 9,00E-30      | 2          | 3/3                 | 4E-51-2E-46   | 42-686     |
| <i>Flaviviridae</i>               | 1/2                 |               |            |                     |               |            | 1/3                 |               |            |
| Iguape virus                      | 1/2                 | 1,00E-41      | 2          | 2/4                 | 3,00E-17      | 9          | 1/3                 | 1,00E-31      | 9          |
| Dengue virus                      |                     |               |            | 1/4                 | 1E-28-8E-65   | 2-6        |                     |               |            |
| <i>Herpesviridae</i>              |                     |               |            | 4/4                 |               |            |                     |               |            |
| <i>Alphaherpesviridae</i>         |                     |               |            | 4/4                 |               |            |                     |               |            |
| Various alphaherpesviruses        |                     |               |            | 4/4                 | 5E-27-6E-9    | 2-6        |                     |               |            |
| <i>Betaherpesvirinae</i>          |                     |               |            | 2/4                 |               |            |                     |               |            |
| Various betaherpesviruses         |                     |               |            | 2/4                 | 2E-19-2E-14   | 2-3        |                     |               |            |
| <i>Gammaherpesviridae</i>         |                     |               |            | 1/4                 |               |            |                     |               |            |
| Various gammaherpesviruses        |                     |               |            | 1/4                 | 1,00E-14      | 5          |                     |               |            |
| <i>Papillomaviridae</i>           |                     |               |            | 1/4                 |               |            |                     |               |            |
| Bovine papillomavirus             |                     |               |            | 1/4                 | 2,00E-30      | 6          |                     |               |            |
| Pudu puda papillomavirus          |                     |               |            | 1/4                 | 6,00E-18      | 2          |                     |               |            |
| <i>Parvoviridae</i>               |                     |               |            | X                   |               |            |                     |               |            |
| Red-crowned crane parvovirus      |                     |               |            | 3/4                 | 2E-12-2E-14   | 61-109     |                     |               |            |
| Porcine bocavirus                 |                     |               |            | 1/4                 | 9,00E-08      | 2          |                     |               |            |
| <i>Peribunyaviridae</i>           |                     |               |            | 1/4                 |               |            |                     |               |            |
| Orthobunyavirus sp.               |                     |               |            | 1/4                 | 1,00E-23      | 2          | 2/3                 | 8E-25-1E-23   | 7-11       |
| Ngari virus                       |                     |               |            |                     |               |            | 1/3                 | 1,00E-27      | 1          |
| Simbu virus                       |                     |               |            |                     |               |            | 1/3                 | 8,00E-06      | 1          |
| Shamonda virus                    |                     |               |            |                     |               |            | 1/3                 | 5,00E-08      | 1          |
| <i>Picobirnaviridae</i>           |                     |               |            |                     |               |            | 2/3                 |               |            |
| Marmot picobirnavirus             |                     |               |            |                     |               |            | 1/3                 | 1,00E-08      | 2          |
| Fox picobirnavirus                |                     |               |            |                     |               |            | 1/3                 | 1,00E-06      | 2          |
| Human picobirnavirus              |                     |               |            |                     |               |            | 1/3                 | 1,00E-27      | 2          |
| Macaque picobirnavirus            |                     |               |            |                     |               |            | 1/3                 | 2,00E-10      | 2          |
| <i>Poxviridae</i>                 |                     |               |            | 1/4                 |               |            |                     |               |            |
| Orf virus                         |                     |               |            | 1/4                 | 1,00E-50      | 2          |                     |               |            |
| <i>Reoviridae</i>                 | 1/2                 |               |            |                     |               |            |                     |               |            |
| Bovine rotavirus                  | 1/2                 | 1,00E-84      | 2          | 1/4                 | 2,00E-31      | 8          |                     |               |            |
| Other rotaviruses                 |                     |               |            | 2/4                 | 3E-44-9E-8    | 2          |                     |               |            |
| <i>Small circular DNA viruses</i> | 1/2                 |               |            |                     |               |            |                     |               |            |

|                                            |     |          |     |             |             |      |     |             |      |
|--------------------------------------------|-----|----------|-----|-------------|-------------|------|-----|-------------|------|
| <i>Circoviridae</i>                        |     |          |     |             |             |      | 1/3 |             |      |
| Bat assoc. cyclovirus                      |     |          |     |             |             |      | 1/3 | 4,00E-27    | 2    |
| Chimpanzee faeces assoc. c virus 1         |     |          | 2/4 | 2E-16–3E-16 | 7           |      |     |             |      |
| Porcine serum-assoc. circular virus        |     |          | 1/4 | 1,00E-15    | 6           |      |     |             |      |
| Other circoviruses                         |     |          | 1/4 | 3,00E-10    | 4           |      |     |             |      |
| <i>Genomoviridae</i>                       |     |          |     |             |             |      | 1/3 |             |      |
| Cattle blood-assoc. Gemycircular-virus     |     |          |     |             |             |      | 1/3 | 7,00E-12    | 1    |
| Giant panda assoc. Gemycircular-virus      |     |          | 1/4 | 4,00E-29    | 3           |      | 1/3 | 1,00E-06    | 2    |
| Other Genomoviruses                        |     |          | 2/4 | 4E-60–2E-13 | 1-2         |      |     |             |      |
| <i>Smacoviridae</i>                        | 1/2 |          |     |             |             |      |     |             |      |
| Goat assoc. porprismacovirus               | 1/2 | 6,00E-37 | 48  |             |             |      |     |             |      |
| Sheep faeces assoc. smacovirus 1           | 1/2 | 3,00E+23 | 48  |             |             |      |     |             |      |
| Porcine assoc. smacovirus                  | 1/2 | 1,00E-07 | 15  |             |             |      |     |             |      |
| Odonata-assoc. circular virus-21           | 1/2 | 3,00E-09 | 4   |             |             |      |     |             |      |
| Alces alces faeces assoc. smacovirus       | 1/2 | 3,00E+16 | 2   |             |             |      |     |             |      |
| Sewage-assoc. circular DNA virus-9         |     |          |     | 1/4         | 2,00E-37    | 13   |     |             |      |
| Porcine assoc. porprismacovirus            |     |          |     | 2/4         | 7E-35–3E-23 | 4–10 |     |             |      |
| Turkey assoc. porprismacovirus 1           |     |          |     | 1/4         | 3,00E-13    | 5    |     |             |      |
| Macaca mulatta feces assoc. virus 2        |     |          |     | 2/4         | 1E-41–8E-29 | 2–4  |     |             |      |
| Other smacovirus                           |     |          |     | 3/4         | 1E-31–      | 2–5  |     |             |      |
| Unclassified cressdnaviricota              |     |          |     | 1/4         |             |      |     |             |      |
| CRESS virus sp.                            |     |          |     | 1/4         | 2,00E-52    | 19   |     |             |      |
| <i>Unclassified ssDNA viruses</i>          |     |          |     | X           |             |      |     |             |      |
| <i>Fly assoc. circular virus 6</i>         |     |          |     | 1/4         | 1,00E-53    | 10   |     |             |      |
| <i>Fly assoc. circular virus 7</i>         |     |          |     | 1/4         | 7,00E-10    | 10   |     |             |      |
| <i>Goat blood assoc. virus</i>             |     |          |     | 1/4         | 9,00E-13    | 3    |     |             |      |
| <i>Chicken stool-assoc. circular virus</i> |     |          |     | 2/4         | 5E-25–1E-13 | 2–3  |     |             |      |
| <i>Other unclassified ssDNA virus</i>      |     |          |     | 2/4         | 2E-7–8E-6   | 2    |     |             |      |
| <i>Unclassified viruses</i>                | 1/2 |          |     |             |             |      | 2/3 |             |      |
| Phitovirus                                 | 1/2 | 4,00E-10 | 2   |             |             |      |     |             |      |
| Statovirus                                 |     |          |     |             |             |      | 2/3 | 2E-17–2E-38 | 2–10 |

**Supplementary Table S3.** Viral blastn hits from nasal swabs collected from semi-domesticated Eurasian tundra reindeer herds in Sweden during late autumn 2016. Reindeer were sampled in herds from three regions (A, B, C).

| Virus                    | Region A 08-11-2016 |               |            | Region B 06-12-2016 |               |            | Region C 01-11-2016 |               |            |
|--------------------------|---------------------|---------------|------------|---------------------|---------------|------------|---------------------|---------------|------------|
|                          | Pools               | e-value (min) | Read count | Pools               | e-value (min) | Read count | Pools               | e-value (min) | Read count |
| <i>Adenoviridae</i>      |                     |               |            | 1/4                 |               |            |                     |               |            |
| Bovine adenovirus type 3 |                     |               |            | 1/4                 | 3,00E-35      | 4          |                     |               |            |
| Deer mastadenovirus B    |                     |               |            | 1/4                 | 3,00E-42      | 2          |                     |               |            |
| Ovine adenovirus 6       |                     |               |            | 1/4                 | 8,00E-45      | 2          |                     |               |            |

|                                            |     |             |        |     |             |         |     |             |        |
|--------------------------------------------|-----|-------------|--------|-----|-------------|---------|-----|-------------|--------|
| <i>Arenaviridae</i>                        | 7/7 |             |        | 4/4 |             |         | 8/8 |             |        |
| Guanarito mammarenavirus                   | 7/7 | 3E-51-2E-48 | 84-518 | 4/4 | 2E-51-1E-48 | 165-429 | 8/8 | 1E-51-9E-43 | 10-276 |
| Lassa mammarenavirus                       | 7/7 | 1E-75-2E-52 | 7-26   | 4/4 | 2E-79-4E-70 | 15-28   | 7/8 | 3E-77-1E-54 | 7-26   |
| Luna mammarenavirus                        | 1/7 | 3,00E-29    | 1      |     |             |         |     |             |        |
| <i>Flaviviridae</i>                        | 2/7 |             |        | 1/4 |             |         | 1/8 |             |        |
| Bovine viral diarrhea virus-1              | 2/7 | 1E-69-2E-43 | 2      | 1/4 | 6,00E-59    | 2       | 1/8 | 5,00E-53    | 2      |
| Dengue virus                               |     |             |        | 1/4 | 2,00E-06    | 2       |     |             |        |
| <i>Herpesviridae</i>                       |     |             |        |     |             |         | 3/8 |             |        |
| <i>Alphaherpesviridae</i>                  |     |             |        |     |             |         | 3/8 |             |        |
| Various alphaherpesviruses                 |     |             |        |     |             |         | 3/8 | 4E-20-1E-6  | 2-3    |
| <i>Betaherpesvirinae</i>                   |     |             |        |     |             |         | 1/8 |             |        |
| Various betaherpesviruses                  |     |             |        |     |             |         | 1/8 | 1,00E-09    | 3      |
| <i>Gammaherpesvirinae</i>                  |     |             |        |     |             |         |     |             |        |
| Bovine herpesvirus 6                       |     |             |        |     |             |         | 2/8 | 7E-43-3E-30 | 1-57   |
| Ovine/caprine herpesvirus 2                |     |             |        |     |             |         | 2/8 | 8E-37-4E-28 | 20-61  |
| Alcelaphine herpesvirus 2                  |     |             |        |     |             |         | 2/8 | 9E-43-1E-40 | 11-52  |
| Alcelaphine herpesvirus 1                  |     |             |        |     |             |         | 2/8 | 2E-44-1E-40 | 11-42  |
| Other gammaherpesviruses                   |     |             |        |     |             |         | 2/8 | 5E-27-6E-20 | 6-38   |
| <i>Paramyxoviridae</i>                     | 1/7 |             |        |     |             |         | 1/8 |             |        |
| Human Respirivirus 1                       | 1/7 | 2,00E-48    | 2      |     |             |         | 1/8 | 2,00E-48    | 2      |
| <i>Parvoviridae</i>                        | 2/7 |             |        | 1/4 |             |         | 2/8 |             |        |
| Red-crowned crane parvovirus               | 2/7 | 5E-14-3E-10 | 2-26   | 1/4 | 2,00E-12    | 13      | 2/8 | 3E-17-3E-14 | 42-48  |
| <i>Peribunyaviridae</i>                    | 2/7 |             |        | 3/4 |             |         | 4/8 |             |        |
| Orthobunyavirus sp.                        | 2/7 | 9E-24-4E-21 | 2-4    | 3/4 | 1E-22-6E20  | 2       | 4/8 | 1E-22-8E-25 | 2-6    |
| <i>Poxviridae</i>                          | 2/7 |             |        | 1/4 |             |         |     |             |        |
| Orf virus                                  | 2/7 | 2E-37-2E-26 | 2      | 1/4 | 6,00E-54    | 2       | 1/8 | 1,00E-41    | 3      |
| White-tailed deer poxvirus                 |     |             |        |     |             |         | 1/8 | 2,00E-35    | 2      |
| <i>Small circular DNA viruses</i>          |     |             |        |     |             |         |     |             |        |
| <i>Circoviridae</i>                        |     |             |        |     |             |         | 1/8 |             |        |
| Chimpanzee faeces assoc. c virus 1         |     |             |        |     |             |         | 1/8 | 6,00E-09    | 2      |
| <i>Genomoviridae</i>                       | 1/7 |             |        |     |             |         |     |             |        |
| Blackbird faeces-assoc. Gemycircular-virus | 1/7 | 1,00E-07    | 2      |     |             |         |     |             |        |
| <i>Unclassified ssDNA viruses</i>          | 1/7 |             |        |     |             |         |     |             |        |
| Porcine serum-assoc. circular virus        | 1/7 | 7,00E-46    | 2      |     |             |         |     |             |        |

**Supplementary Table S4.** Viral blastn hits from nasal swabs collected from semi-domesticated Eurasian tundra reindeer herds in Sweden during late autumn 2017. Reindeer were sampled in herds from three regions (A, B, C).

| Virus                          | Region A 08-12-2017 |               |            | Region B 08-12-2017 |               |            | Region C 16-11-2017 |               |            |
|--------------------------------|---------------------|---------------|------------|---------------------|---------------|------------|---------------------|---------------|------------|
|                                | Pools               | e-value (min) | Read count | Pools               | e-value (min) | Read count | Pools               | e-value (min) | Read count |
| <i>Arenaviridae</i>            |                     |               |            | 3/3                 |               |            | 4/4                 |               |            |
| Guanarito mammarenavirus virus | 2/4                 | 3E-39-2E-38   | 5-6        | 2/3                 | 8E-48-1E-46   | 7-9        | 4/4                 | 6E-49-7E-48   | 15-152     |

|                                         | Lassa mammarenavirus | 2/4        | 2E-69–1E-43 | 12–18 | 3/3 | 1E-70–2E-32 | 12–40 | 4/4 | 6E-77–3E-73 | 63–242 |
|-----------------------------------------|----------------------|------------|-------------|-------|-----|-------------|-------|-----|-------------|--------|
| <i>Flaviviridae</i>                     |                      |            |             |       |     |             |       |     | 1/4         |        |
| Bovine viral diarrhoea virus 1          |                      |            |             |       |     |             |       | 1/4 | 1,00E-34    | 1      |
| Dengue virus                            |                      |            |             |       | 1/3 | 2,00E-14    | 9     |     |             |        |
| Iguape virus                            |                      |            |             |       | 1/3 | 1,00E-35    | 2     | 1/4 | 5,00E-32    | 5      |
| <i>Herpesviridae</i>                    |                      |            |             |       |     |             |       |     | 1/4         |        |
| <i>Alphaherpesviridae</i>               |                      |            |             |       |     |             |       |     |             |        |
| Various alphaherpesviruses              |                      |            |             |       | 1/3 | 4,00E-41    | 4     |     |             |        |
| <i>Gammaherpesvirinae</i>               |                      |            |             |       |     |             |       |     | 1/4         |        |
| Bovine herpesvirus 6                    | 2/4                  | 4,00E-09   | 3           |       |     |             |       |     | 2,00E-13    | 4      |
| Ovine/caprine herpesvirus 2             |                      |            |             |       |     |             |       |     | 8,00E-24    | 3      |
| Alcelaphine herpesvirus 1               | 2/4                  | 2,00E-08   | 2           |       |     |             |       |     | 2,00E-29    | 2      |
| Alcelaphine herpesvirus 2               | 2/4                  | 2,00E-12   | 1           |       |     |             |       |     | 1,00E-22    | 4      |
| Saimiriine herpesvirus 2                |                      |            |             |       | 2/3 | 1E-15–2E-15 | 2     |     |             |        |
| Other gammaherpesviruses                | 2/4                  | 1E-9–3E-9  | 1–2         |       |     |             |       |     | 6E-32–1E-8  | 1–2    |
| <i>Paramyxoviridae</i>                  |                      |            |             |       |     |             |       |     | 1/4         |        |
| Human Respirivirus 1                    |                      |            |             |       |     |             |       | 1/4 | 1,00E-22    | 2      |
| <i>Parvoviridae</i>                     |                      |            |             |       |     |             |       |     | 1/4         |        |
| Bovine parvovirus 3                     |                      |            |             |       | 1/4 |             |       | 1/4 | 3,00E-12    | 2      |
| Red-crowned crane parvovirus            | 2/4                  | 7E-13–1E-9 | 4–5         |       | 1/4 | 2,00E-12    | 13    |     |             |        |
| Ungulate bocaparvovirus 6               |                      |            |             |       |     |             |       | 1/4 | 1,00E-06    | 1      |
| <i>Peribunyaviridae</i>                 |                      |            |             |       |     |             |       |     | 4/4         |        |
| Orthobunyavirus sp.                     |                      |            |             |       | 1/3 | 1,00E-23    | 4     | 4/4 | 1E-25–2E-19 | 4–23   |
| <i>Picobirnaviridae</i>                 |                      |            |             |       |     |             |       |     | 1/4         |        |
| Marmot picobirnavirus                   |                      |            |             |       |     |             |       | 1/4 | 2,00E-08    | 2      |
| <i>Poxviridae</i>                       |                      |            |             |       |     |             |       |     | 1/4         |        |
| Orf virus                               | 1/4                  | 6,00E-20   | 2           |       | 1/3 | 4,00E-66    | 4     | 1/4 | 2,00E-49    | 2      |
| Yoka poxvirus                           |                      |            |             |       | 1/3 | 1,00E-07    | 2     |     |             |        |
| Eptesipox virus                         |                      |            |             |       | 1/3 | 5,00E-06    | 2     |     |             |        |
| <i>Reoviridae</i>                       |                      |            |             |       |     |             |       |     | 1/4         |        |
| Kammavanpettai virus                    |                      |            |             |       |     |             |       | 1/4 | 2,00E-18    | 2      |
| <i>Small circular DNA viruses</i>       |                      |            |             |       |     |             |       |     |             |        |
| <i>Circoviridae</i>                     |                      |            |             |       |     |             |       |     | 1/4         |        |
| Bat assoc. circovirus 7                 |                      |            |             |       |     |             |       | 1/4 | 1,00E-20    | 1      |
| Cattle blood-assoc. Gemycircularvirus 4 |                      |            |             |       | 1/3 | 2,00E-06    | 1     |     |             |        |
| Porcine circovirus 3                    |                      |            |             |       |     |             |       | 1/4 | 8,00E-22    | 3      |
| <i>Genomoviridae</i>                    |                      |            |             |       |     |             |       |     | 1/4         |        |
| Faeces assoc. Gemycircularvirus 21      |                      |            |             |       |     |             |       | 1/4 | 2,00E-16    | 2      |
| Giant panda assoc. gemycircularvirus    |                      |            |             |       | 1/3 | 1,00E-85    | 13    |     |             |        |
| Pteropus assoc. gemycircularvirus 4     |                      |            |             |       | 1/3 | 2,00E-12    | 1     |     |             |        |
| Tick gemycircularvirus                  |                      |            |             |       |     |             |       | 1/4 | 1,00E-17    | 2      |
| <i>Unclassified viruses</i>             |                      |            |             |       |     |             |       |     | 1/4         |        |

**Supplementary Table S5.** Viral blastn hits from rectal swabs collected from semi-domesticated Eurasian tundra reindeer herds in Norway during Nov-Jan 2016-17. Reindeer were sampled in herds from three regions (A, B, C).

| Virus                         | Region A 23-11-2016 |               |            | Region B 26-01-2017 |               |            | Region C 24-01-2017 |               |            |
|-------------------------------|---------------------|---------------|------------|---------------------|---------------|------------|---------------------|---------------|------------|
|                               | Pools               | e-value (min) | Read count | Pools               | e-value (min) | Read count | Pools               | e-value (min) | Read count |
| <i>Arenaviridae</i>           | 3/3                 |               |            |                     |               |            | 4/4                 |               |            |
| Guanarito mammarenavirus      | 3/3                 | 2E-51–4E-43   | 9-133      | 3/4                 | 7E-44–2E-40   | 5–15       | 4/4                 | 4E-53–2E-44   | 13–146     |
| Lassa mammarenavirus          | 3/3                 | 3E-72–1E-47   | 4–44       | 1/4                 | 9,00E-71      | 8          | 4/4                 | 4E-77–3E-72   | 7–47       |
| <i>Astroviridae</i>           |                     |               |            | 3/4                 |               |            |                     |               |            |
| Bovine astrovirus             | 1/3                 | 7,00E-43      | 2          | 2/4                 | 7E-95–4E-73   | 2–44       |                     |               |            |
| Yak astrovirus                |                     |               |            | 2/4                 | 1E-104–3E-36  | 1–17       |                     |               |            |
| Deer astrovirus               | 1/3                 | 3,00E-16      | 2          | 2/4                 | 1E-59–3E-53   | 15         |                     |               |            |
| Sichuan takin astrovirus      |                     |               |            | 2/4                 | 4E-84–1E-66   | 3–11       |                     |               |            |
| Other astroviruses            |                     |               |            | 1/4                 | 4,00E-53      | 3          |                     |               |            |
| <i>Caliciviridae</i>          |                     |               |            |                     |               |            |                     |               |            |
| Bovine calicivirus            |                     |               |            | 2/4                 | 7E-56–1E-7    | 2–38       |                     |               |            |
| Other caliciviruses           |                     |               |            | 2/4                 | 4E-9–2E-6     | 1–5        |                     |               |            |
| <i>Flaviviridae</i>           |                     |               |            |                     |               |            |                     |               |            |
| Bovine viral diarrhea virus 1 |                     |               |            |                     |               |            | 1/4                 | 7,00E-87      | 3          |
| Dengue virus                  |                     |               |            |                     |               |            | 1/4                 | 2,00E-07      | 4          |
| <i>Herpesviridae</i>          | 3/3                 |               |            | 4/4                 |               |            | 2/4                 |               |            |
| <i>Alphaherpesvirinae</i>     | 3/3                 |               |            | 4/4                 |               |            | 2/4                 |               |            |
| Various alphaherpesviruses    | 3/3                 | 1E-21–3E-10   | 4          | 4/4                 | 2E-33–5E-8    | 2–6        | 2/4                 | 5E-31–6E-6    | 3–4        |
| <i>Betaherpesvirinae</i>      |                     |               |            | 1/4                 |               |            |                     |               |            |
| Various betaherpesviruses     |                     |               |            | 1/4                 | 3,00E-09      | 2          |                     |               |            |
| <i>Gammaherpesvirinae</i>     | 2/3                 |               |            | 2/4                 |               |            |                     |               |            |
| Various gammaherpesviruses    | 2/3                 | 9E-29–2E-12   | 3–8        | 2/4                 | 3E-23–5E-21   | 3–4        |                     |               |            |
| <i>Papillomaviridae</i>       |                     |               |            | 1/4                 |               |            | 1/4                 |               |            |
| Bos taurus papillomavirus 16  |                     |               |            | 1/4                 | 1,00E-21      | 2          |                     |               |            |
| Bovine papillomavirus         | 1/3                 | 1,00E-66      | 25         |                     |               |            | 1/4                 | 5,00E-59      | 16         |
| Human papillomavirus          | 1/3                 | 6,00E-13      | 9          |                     |               |            |                     |               |            |
| Pudu puda papillomavirus      |                     |               |            |                     |               |            | 1/4                 | 2,00E-75      | 10         |
| Ovine papillomavirus          | 1/3                 | 4,00E-09      | 1          |                     |               |            | 1/4                 | 6,00E-20      | 3          |
| <i>Peribunyaviridae</i>       | 1/3                 |               |            |                     |               |            | X                   |               |            |
| Orthobunyavirus sp.           | 1/3                 | 1,00E-22      | 4          |                     |               |            | 1/4                 | 1,00E-23      | 3          |
| Ngari virus                   |                     |               |            |                     |               |            | 1/4                 | 1,00E-19      | 1          |
| <i>Picobirnaviridae</i>       | 1/3                 |               |            |                     |               |            |                     |               |            |
| Marmot picobirnavirus         | 1/3                 | 2,00E-27      | 2          | 2/4                 | 2E-76–2E-50   | 2          |                     |               |            |
| Other picobirnaviruses        |                     |               |            | 2/4                 | 2E-14–2E-6    | 2          |                     |               |            |
| <i>Picornaviridae</i>         |                     |               |            |                     |               |            | 1/4                 |               |            |
| Bovine Aichivirus B           |                     |               |            | 1/4                 | 1,00E-15      | 1          |                     |               |            |

|                                           |     |           |   |     |               |       |     |              |     |
|-------------------------------------------|-----|-----------|---|-----|---------------|-------|-----|--------------|-----|
| Caprine kobuvirus                         |     |           |   | 1/4 | 1,00E-115     | 44    |     |              |     |
| Cattle kobuvirus                          |     |           |   | 2/4 | 2E-83-6E-64   | 4-27  |     |              |     |
| Other kobuviruses                         |     |           |   |     |               |       | 1/4 | 2,00E-71     | 3   |
| Porcine Aichivirus C                      |     |           |   | 1/4 | 3,00E-30      | 2     |     |              |     |
| Porcine kobuvirus                         |     |           |   | 2/4 | 4E-85-1E-52   | 2-53  | 1/4 | 4,00E-72     | 4   |
| <i>Poxviridae</i>                         |     |           |   |     |               |       |     |              |     |
| Cow poxvirus                              | 1/3 | 1,00E-09  | 1 |     |               |       |     |              |     |
| Orf virus                                 | 1/3 | 2,00E-75  | 2 |     |               |       | 3/4 | 1E-105-2E-21 | 1-4 |
| Orthopoxvirus Abatino                     |     |           |   | 1/4 | 3,00E-09      | 3     |     |              |     |
| Other poxviruses                          |     |           |   | 2/4 | 6E-25-7E-6    | 2-4   | -   | 4E-14-2E-11  | 2   |
| Squirrel poxvirus                         |     |           |   | 3/4 | 1E-19-3E-11   | 1-4   |     |              |     |
| <i>Reoviridae</i>                         |     |           |   |     |               |       |     |              |     |
| Human rotavirus A                         | 1/3 | 1,00E-101 | 3 | 2/4 | 1E-134-1E-114 | 1-12  |     |              |     |
| Bovine rotavirus A                        |     |           |   | 1/4 | 1,00E-138     | 4     |     |              |     |
| Feline rotavirus A                        | 1/3 | 1,00E-59  | 1 |     |               |       |     |              |     |
| Porcine rotavirus A                       |     |           |   | 2/4 | 1E-105-6E-45  | 2-4   |     |              |     |
| Other rotavirus A                         |     |           |   | 3/4 | 1E-133-1E-78  | 1-4   |     |              |     |
| <i>Small circular DNA viruses</i>         |     |           |   |     |               |       |     |              |     |
| <i>Circoviridae</i>                       |     |           |   |     |               |       |     |              |     |
| Chimpanzee faeces assoc. cc<br>circovirus |     |           |   | 1/4 | 3,00E-09      | 15    |     |              |     |
| Dromedary stool-assoc. circular virus     |     |           |   | 1/4 | 5,00E-14      | 5     |     |              |     |
| Other circoviruses                        |     |           |   | 1/4 | 5,00E-20      | 3     |     |              |     |
| <i>Genomoviridae</i>                      |     |           |   |     |               |       |     |              |     |
| Sewage derived gemycircularvirus 1        |     |           |   | 1/4 | 1,00E-18      | 4     |     |              |     |
| <i>Smacoviridae</i>                       |     |           |   |     |               |       |     |              |     |
| Porcine feces assoc. smacoviruses         |     |           |   | 4/4 | 3E-55-5E-14   | 3-169 | 1/4 |              |     |
| Chimpanzee feces assoc. smacovirus        |     |           |   | 1/4 | 5,00E-07      | 54    |     |              |     |
| Alces alces faeces assoc. Smacovirus      |     |           |   | 2/4 | 5E-52-8E-50   | 8-27  | 1/4 | 3,00E-17     | 2   |
| Sheep feces assoc. Smacoviruses           |     |           |   | 3/4 | 2E-51-3E-17   | 6-23  |     |              |     |
| Cattle blood-assoc. smacovirus            |     |           |   | 1/4 | 5,00E-33      | 29    |     |              |     |
| Macaque feces assoc. smacoviruses         |     |           |   | 3/4 | 4E-34-8E-13   | 7-19  |     |              |     |
| Other Smacoviruses                        |     |           |   | 4/4 | 1E-39-3E-23   | 3-34  |     |              |     |
| <i>Unclassified viruses</i>               |     |           |   |     |               |       |     |              |     |
| Porcine serum-assoc. circular virus       |     |           |   | 3/4 | 2E-15-4E-15   | 3-96  |     |              |     |
| Chicken stool-assoc. circular virus       |     |           |   | 1/4 | 1,00E-22      | 33    |     |              |     |
| Rodent stool-assoc. Circular virus        | 1/3 | 1,00E-33  | 2 |     |               |       |     |              |     |
| Unidentified circular ssDNA virus         |     |           |   | 3/4 | 1E-47-3E-09   | 3-11  |     |              |     |
| Other unclassified viruses                |     |           |   | 1/4 | 1,00E-13      | 6     |     |              |     |
| <i>Unclassified viruses</i>               |     |           |   |     |               |       |     |              |     |
| Hubei partiti-like virus 55               |     |           |   | 1/4 | 6,00E-06      | 2     | 1/4 |              |     |
| Statovirus D1                             |     |           |   | 1/4 | 1,00E-09      | 2     | 1/4 | 2,00E-13     | 2   |

**Supplementary Table S6.** Viral blastn hits from rectal swabs collected from semi-domesticated Eurasian tundra reindeer herds in Norway during Nov-Apr 2017-18. Reindeer were sampled in herds from three regions (A, B, C).

| Viruses                               | Region A 23-11-2017 |               |            | Region B |               |            | Region C 24-01-2018 |               |            |
|---------------------------------------|---------------------|---------------|------------|----------|---------------|------------|---------------------|---------------|------------|
|                                       | Pools               | e-value (min) | Read count | Pools    | e-value (min) | Read count | Pools               | e-value (min) | Read count |
| <i>Alloherpesviridae</i>              | 1/4                 |               |            |          |               |            |                     |               |            |
| Cyprinid herpesvirus 3                | 1/4                 | 3,00E-49      | 8          |          |               |            |                     |               |            |
| <i>Arenaviridae</i>                   | 1/4                 |               |            |          |               |            | 1/4                 |               |            |
| Lassa mammarynavirus                  | 1/4                 | 7,00E-07      | 2          |          |               |            | 1/4                 | 2,00E-06      | 2          |
| <i>Flaviviridae</i>                   |                     |               |            | 1/3      |               |            |                     |               |            |
| Bovine viral diarrhoea virus 1        |                     |               |            |          |               |            |                     |               |            |
| Iguape virus                          |                     |               |            | 1/3      | 1,00E-41      | 2          |                     |               |            |
| <i>Herpesviridae</i>                  | 4/4                 |               |            |          |               |            |                     |               |            |
| <i>Alphaherpesvirinae</i>             |                     |               |            |          |               |            | 1/4                 |               |            |
| Macacine alphaherpesvirus 1           |                     |               |            |          |               |            | 1/4                 | 2,00E-09      | 2          |
| <i>Betaherpesvirinae</i>              |                     |               |            |          |               |            | 1/4                 |               |            |
| Various betaherpesviruses             |                     |               |            |          |               |            | 1/4                 | 1,00E-21      | 2          |
| <i>Gammaherpesvirinae</i>             | 4/4                 |               |            |          |               |            |                     |               |            |
| Alcelaphine herpesvirus 1             | 1/4                 | 5,00E-21      | 2          |          |               |            |                     |               |            |
| Alcelaphine herpesvirus 2             | 1/4                 | 4,00E-24      | 4          |          |               |            |                     |               |            |
| Bovine herpesvirus 6                  | 2/4                 | 7E-29-1E-13   | 2-3        |          |               |            | 1/4                 | 2,00E-10      | 2          |
| Ovine herpesvirus 2                   | 1/4                 | 5,00E-07      | 2          |          |               |            | 1/4                 | 2,00E-24      | 2          |
| Other gammaherpesviruses              | 3/4                 | 9E-29-5E-6    | 2-10       |          |               |            | 1/4                 | 1,00E-16      | 4          |
| <i>Papillomaviridae</i>               |                     |               |            |          |               |            | 2/4                 |               |            |
| Bovine papillomaviruses               |                     |               |            |          |               |            | 1/4                 | 5,00E-59      | 182        |
| Human papilloma virus 5               |                     |               |            |          |               |            | 1/4                 | 5,00E-10      | 10         |
| Puda Puda papillomavirus 1            |                     |               |            |          |               |            | 1/4                 | 6,00E-12      | 4          |
| Other papillomaviruses                |                     |               |            |          |               |            | 1/4                 | 4,00E-16      | 6          |
| <i>Parvoviridae</i>                   |                     |               |            |          |               |            | 2/4                 |               |            |
| Red-crowned crane parvovirus          |                     |               |            |          |               |            | 2/4                 | 1E-15-4E-15   | 17-18      |
| Tasmanian devil-assoc. Chapparrivirus |                     |               |            | 1/3      | 8,00E-16      | 3          |                     |               |            |
| Other parvoviruses                    |                     |               |            | 2/3      | 4E-12-5E-10   | 2-3        |                     |               |            |
| <i>Picobirnaviridae</i>               |                     |               |            | 1/3      |               |            | 4/4                 |               |            |
| Human picobirnavirus                  | 3/4                 | 1E-72-9E-24   | 2-11       | 1/3      | 3,00E-44      | 2          | 1/4                 | 1,00E-86      | 6          |
| Dromedary picobirnavirus              | 1/4                 | 2,00E-25      | 4          |          |               |            | 2/4                 | 2E-74-3E-22   | 2-6        |
| Equine Picobirnavirus                 | 1/4                 | 4,00E-06      | 2          |          |               |            |                     |               |            |
| Macaque picobirnavirus                |                     |               |            |          |               |            | 4/4                 | 8E-36-1E-18   | 2-10       |
| Marmot picobirnavirus                 |                     |               |            |          |               |            | 3/4                 | 6E-90-7E-15   | 2-6        |
| Gorilla picobirnavirus                |                     |               |            |          |               |            | 2/4                 | 2E-6-9E-6     | 3-4        |
| Genet fecal picobirnavirus            |                     |               |            |          |               |            | 1/4                 | 1,00E-91      | 14         |
| Other picobirnaviruses                |                     |               |            |          |               |            | 2/4                 | 3e-28-2E-10   | 2          |
| <i>Picornavirales (Unclassified)</i>  | 2/4                 |               |            |          |               |            | 2/4                 |               |            |
| Posavirus 1                           | 2/4                 | 1E-8-2E-8     | 2-3        |          |               |            | 2/4                 | 5E-8-2E-8     | 7-10       |



|                                              |     |             |      |     |              |        |     |              |       |
|----------------------------------------------|-----|-------------|------|-----|--------------|--------|-----|--------------|-------|
| <i>Picornaviridae</i>                        | 1/4 |             |      |     |              |        |     |              |       |
| Caprine kobuvirus                            |     |             |      |     |              |        | 1/4 | 1,00E-59     | 10    |
| Porcine kobuvirus                            | 1/4 | 1,00E-134   | 6    |     |              |        | 3/4 | 1E-117-3E-27 | 2-14  |
| <i>Pneumoviridae</i>                         |     |             |      |     |              |        | 2/4 |              |       |
| Swine pneumovirus 57                         |     |             |      |     |              |        | 2/4 | 2E-6-2E-8    | 2     |
| <i>Poxviridae</i>                            |     |             |      |     |              |        | 1/4 |              |       |
| Canarypoxvirus                               |     |             |      |     |              |        | 1/4 | 3,00E-06     | 4     |
| <i>Small circular DNA viruses</i>            |     |             |      |     |              |        | 3/3 |              |       |
| <i>Circoviridae</i>                          |     |             |      |     |              |        | 3/3 |              |       |
| Chimpanzee faeces assoc. virus 1             | 1/4 | 4,00E-08    | 2    |     |              |        |     |              |       |
| CRESS virus sp.                              | 3/4 | 1E-17-2E-8  | 2    | 3/3 | 1E-117-1E-55 | 2-4228 |     |              |       |
| Various circoviruses                         |     |             |      |     |              |        | 2/4 | 2E-20-2E-7   | 2-8   |
| <i>Genomoviridae</i>                         |     |             |      |     |              |        |     |              |       |
| Dragonfly-assoc. circular virus 2            |     |             |      |     |              |        | 1/4 | 1,00E-35     | 11    |
| Giant panda assoc. gemycircularvirus         | 1/4 | 2,00E-20    | 6    |     |              |        |     |              |       |
| Gopherus assoc. genomovirus 1                |     |             |      | 1/3 | 1,00E-11     | 13     |     |              |       |
| Insect assoc. genomoviruses                  | 1/4 | 2,00E-52    | 24   | 1/3 | 2,00E-89     | 66     |     |              |       |
| Lynx faeces assoc. genomovirus               |     |             |      |     |              |        | 1/4 | 1,00E-16     | 1     |
| Momordica charantia assoc. virus             |     |             |      |     |              |        | 1/4 | 2,00E-12     | 4     |
| NZ fur seal faeces assoc. virus              |     |             |      | 1/3 | 8,00E-24     | 19     |     |              |       |
| Pteropus assoc. gemycircularvirus 4          | 1/4 | 3,00E-11    | 6    |     |              |        |     |              |       |
| Sewage-assoc. virus                          |     |             |      |     |              |        | 1/4 | 1,00E-12     | 8     |
| Snowshoe hare faeces assoc. ge-<br>nomovirus | 1/4 | 8,00E-12    | 8    | 1/3 | 3,00E-07     | 44     |     |              |       |
| Other gemycircularviruses                    | 1/4 | 2,00E-24    | 4    | 2/3 | 2E-23-3E-15  | 2-10   |     |              |       |
| Other genomoviruses                          |     |             |      | 1/3 | 4,00E-09     | 3      |     |              |       |
| <i>Smacoviridae</i>                          | 2/4 |             |      | 3/3 |              |        | 4/4 |              |       |
| Alces alces faeces assoc. smacovirus         | 2/4 | 4,00E-06    | 4    |     |              |        |     |              |       |
| Cattle-blood assoc. smacovirus               |     |             |      |     |              |        | 1/4 | 8,00E-08     | 10    |
| Chimpanzee feces assoc. smacovirus           |     |             |      |     |              |        | 4/4 | 6E-13-3E-6   | 10-20 |
| Goat assoc. porprismacovirus                 | 2/4 | 8,00E-12    | 5    |     |              |        |     |              |       |
| Insect assoc. smacoviruses                   |     |             |      |     |              |        | 1/4 | 2,00E-27     | 14    |
| Odonata-assoc. circular virus-5              | 2/4 | 1,00E-18    | 3    |     |              |        |     |              |       |
| Porcine assoc. smacovirus                    |     |             |      | 3/3 | 1E-118-5E-50 | 1-1838 |     |              |       |
| Porcine stool assoc. smacovirus              |     |             |      |     |              |        | 2/4 | 9E-27-9E-14  | 12-15 |
| Sheep faeces assoc. smacovirus 1             | 2/4 | 4,00E-18    | 15   | 2/3 | 3E-16-1E-8   | 2-6    |     |              |       |
| Sheep/goat assoc. smacovirus                 |     |             |      |     |              |        | 3/4 | 3E-24-2E-11  | 2-4   |
| Other smacoviruses                           |     |             |      | 3/3 | 3E-62-9E-17  | 6-9    | 1/4 | 2,00E-30     | 15    |
| <i>Unclassified ssDNA viruses</i>            | 2/4 |             |      | 1/3 |              |        |     |              |       |
| Unidentified circular ssDNA viruses          |     |             |      |     |              |        | 1/4 | 2,00E-08     | 19    |
| Bovine faeces assoc. DNA virus 1             |     |             |      |     |              |        | 1/4 | -            | -     |
| Various unclassified ssDNA viruses           | 2/4 | 1E-26-2E-23 | 6-14 | 1/3 | 1,00E-36     | 36     |     |              |       |
| <i>Unclassified environmental viruses</i>    |     |             |      | 1/3 |              |        | 1/4 |              |       |

|                                 |     |          |   |     |            |      |
|---------------------------------|-----|----------|---|-----|------------|------|
| Uncultured viruses              | 1/3 | 1,00E-29 | 4 | 1/4 | 3,00E-14   | 8    |
| <i>Unclassified RNA viruses</i> | 1/3 |          |   |     |            |      |
| Beihai narna-like virus 7       |     |          |   | 1/4 | 3,00E-09   | 4    |
| Hubei narna-like virus 11       | 1/3 | 2,00E-06 | 2 |     |            |      |
| Statovirus D1                   |     |          |   | 3/4 | 2E-50-9E-7 | 5-26 |

**Supplementary Table S7.** Viral blastn hits from nasal swabs collected from semi-domesticated Eurasian tundra reindeer herds in Norway during Nov-Jan 2016-17. Reindeer were sampled in herds from three regions (A, B, C).

| Virus                            | Region A 23-11-2016 |               |            | Region B 26-01-2017 |               |            | Region C 24-01-2017 |               |            |
|----------------------------------|---------------------|---------------|------------|---------------------|---------------|------------|---------------------|---------------|------------|
|                                  | Pools               | e-value (min) | Read count | Pools               | e-value (min) | Read count | Pools               | e-value (min) | Read count |
| <i>Adenoviridae</i>              |                     |               |            |                     |               |            | 1/5                 |               |            |
| California sea lion adenovirus 1 |                     |               |            |                     |               |            | 1/5                 | 8,00E-06      | 2          |
| <i>Arenaviridae</i>              | 7/7                 |               |            | 6/6                 |               |            |                     |               |            |
| Guanarito mammarenavirus         | 1/7                 | 2,00E-44      | 27         | 1/6                 | 1,00E-40      | 9          | 2/5                 | 4E-43-3E-46   | 7-11       |
| Lassa mammarenavirus             | 7/7                 | 3E-79-3E-54   | 2-30       | 6/6                 | 1E-76-1E-46   | 6-21       | 4/5                 | 2E-76-5E-53   | 7-34       |
| <i>Astroviridae</i>              |                     |               |            | 2/6                 |               |            |                     |               |            |
| Hainan astro-like virus 2        |                     |               |            | 2/6                 | 9E-8-1E-7     | 2-4        |                     |               |            |
| <i>Flaviviridae</i>              |                     |               |            | 4/6                 |               |            |                     |               |            |
| Bovine viral diarrhea virus 1    | 2/7                 | 1E-123-2E-55  | 2          | 4/6                 | 2E-45-3E-29   | 1-3        | 2/5                 | 1E-32-9E-24   | 1          |
| Dengue virus                     | 1/7                 | 2,00E-19      | 3          |                     |               |            | 1/5                 | 5,00E-14      | 11         |
| West Nile virus                  | 1/7                 | 7,00E-06      | 1          |                     |               |            |                     |               |            |
| <i>Herpesviridae</i>             |                     |               |            |                     |               |            |                     |               |            |
| <i>Alphaherpesvirinae</i>        | 1/7                 |               |            | 2/6                 |               |            | 2/5                 |               |            |
| Various alphaherpesviruses       | 1/7                 | 5,00E-07      | 3          | 2/6                 | 1E-8-6E-6     | 2-3        | 2/5                 | 3E-23-4E-21   | 2          |
| <i>Betaherpesvirinae</i>         | 2/7                 |               |            | 1/6                 |               |            | 3/5                 |               |            |
| Cervid herpesvirus 3             |                     |               |            | 1/6                 | 1,00E-52      | 2          |                     |               |            |
| Various betaherpesviruses        | 2/7                 | 2E-31-9E-24   | 7-22       |                     |               |            | 3/5                 | 2E-39-6E-14   | 4-5        |
| <i>Papillomaviridae</i>          | 1/7                 |               |            | 1/6                 |               |            |                     |               |            |
| Betapapillomavirus 1             |                     |               |            | 1/6                 | 1,00E-135     | 2          |                     |               |            |
| Reindeer papillomavirus          | 1/7                 | 1,00E-129     | 2          |                     |               |            |                     |               |            |
| <i>Paramyxoviridae</i>           | 1/7                 |               |            | 1/6                 |               |            |                     |               |            |
| Human respirovirus 1             | 1/7                 | 3,00E-23      | 2          | 1/6                 | 2,00E-13      | 2          |                     |               |            |
| Human respirovirus 3             |                     |               |            |                     |               |            | 1/5                 | 1,00E-60      | 15         |
| Bovine respirovirus 3            |                     |               |            |                     |               |            | 2/5                 | 3,00E-62      | 9          |
| Caprine respirovirus 3           |                     |               |            |                     |               |            | 2/5                 | 2,00E-24      | 2          |
| <i>Peribunyaviridae</i>          | 2/7                 |               |            | 2/6                 |               |            | 1/5                 |               |            |
| Orthobunyavirus sp.              | 2/7                 | 1E-22-5E-20   | 2-3        | 2/6                 | 1E-22-5E-21   | 4          | 1/5                 | 1,00E-24      | 2          |
| <i>Poxviridae</i>                | 2/7                 |               |            | 1/6                 |               |            | 1/5                 |               |            |
| Orf virus                        | 2/7                 | 2E-81-9E-49   | 2-4        | 1/6                 | 1,00E-59      | 2          |                     |               |            |
| Various poxviruses               |                     |               |            |                     |               |            | 1/5                 | 1,00E-10      | 2          |
| <i>Reoviridae</i>                |                     |               |            | 1/6                 |               |            |                     |               |            |
| Rotavirus A                      |                     |               |            | 1/6                 | 2,00E-60      | 2          |                     |               |            |

|                                   |     |          |   |     |          |   |
|-----------------------------------|-----|----------|---|-----|----------|---|
| <i>Small circular DNA viruses</i> | 1/7 |          |   |     |          |   |
| <i>Genomoviridae</i>              | 1/7 |          |   |     |          |   |
| Sewage derived gemycircularvirus  | 1/7 | 1,00E-16 | 2 |     |          |   |
| <i>Smacoviridae</i>               |     |          |   |     |          |   |
| Camel assoc. Smacovirus           |     |          |   | 1/6 | 2,00E-38 | 2 |
| Sheep faeces assoc. smacovirus 1  |     |          |   | 1/6 | 1,00E-27 | 2 |

**Supplementary Table S8.** Viral blastn hits from nasal swabs collected from semi-domesticated Eurasian tundra reindeer herds in Norway during Nov-Apr 2017-18. Reindeer were sampled in herds from three regions (A, B, C).

| Virus                                   | Region A 23-11-2017 |               |            | Region B |               |            | Region C 24-01-2018 |               |            |
|-----------------------------------------|---------------------|---------------|------------|----------|---------------|------------|---------------------|---------------|------------|
|                                         | Pools               | e-value (min) | Read count | Pools    | e-value (min) | Read count | Pools               | e-value (min) | Read count |
| <i>Arenaviridae</i>                     |                     |               |            |          |               |            | 1/4                 |               |            |
| Lassa mammarenavirus                    |                     |               |            | 2/4      | 2E-7-2E-6     | 2-4        | 1/4                 | 5,00E-08      | 2          |
| Luna mammarenavirus                     |                     |               |            | 1/4      | 2,00E-39      | 1          |                     |               |            |
| <i>Flaviviridae</i>                     |                     |               |            | 3/4      |               |            |                     |               |            |
| Bovine viral diarrhea virus 1           |                     |               |            |          |               |            | 1/4                 | 8,00E-06      | 1          |
| Dengue virus                            |                     |               |            |          |               |            | 1/4                 | 1,00E-08      | 2          |
| Iguape virus                            |                     |               |            | 3/4      | 1E-69-6E-60   | 8-47       | 3/4                 | 3E-63-2E-39   | 2-8        |
| <i>Herpesviridae</i>                    |                     |               |            | 1/4      |               |            | 4/4                 |               |            |
| <i>Alphaherpesvirinae</i>               |                     |               |            |          |               |            | 1/4                 |               |            |
| Various alphaherpesviruses              |                     |               |            |          |               |            | 1/4                 | 8,00E-44      | 3          |
| <i>Betaherpesvirinae</i>                |                     |               |            |          |               |            | 4/4                 |               |            |
| Human herpesvirus 6                     |                     |               |            |          |               |            | 4/4                 | 6E-39-2E-15   | 2-92       |
| Human herpesvirus 7                     |                     |               |            |          |               |            | 2/4                 | 1E-47-9E-41   | 33-83      |
| Macaca nemestrina herpesvirus 7         |                     |               |            |          |               |            | 2/4                 | 1E-29-2E-25   | 51-276     |
| Various betaherpesviruses               |                     |               |            |          |               |            | 3/4                 | 9E-65-2E-15   | 8-124      |
| <i>Gammaherpesvirinae</i>               |                     |               |            | 1/4      |               |            | 4/4                 |               |            |
| Ovine herpesvirus 2                     | 1/3                 | 4,00E-35      | 2          |          |               |            | 4/4                 | 4E-66-5E-8    | 1-54453    |
| Alcelaphine herpesvirus 2               | 2/3                 | 3E-42-5E-20   | 2          | 1/4      | 4,00E-28      | 2          | 3/4                 | 6E-71-6E-30   | 1-36279    |
| Alcelaphine herpesvirus 1               |                     |               |            |          |               |            | 2/4                 | 7E-64-3E-8    | 2-36702    |
| Bovine herpesvirus 6                    |                     |               |            |          |               |            | 2/4                 | 2E-51-1E-12   | 3-33644    |
| Other gammaherpesviruses                |                     |               |            |          |               |            | 3/4                 | 1E-98-2E-9    | 1-25354    |
| <i>Unclassified herpesviruses</i>       |                     |               |            |          |               |            |                     |               |            |
| Ovine herpesvirus 1                     |                     |               |            |          |               |            | 1/4                 | 7,00E-32      | 1217       |
| Rhinolophus ferrumequinum herpesvirus 1 |                     |               |            |          |               |            | 2/4                 | 2E-13-5E-12   | 16-48      |
| Hipposideros diadema herpesvirus        |                     |               |            |          |               |            | 1/4                 | 1,00E-21      | 32         |
| Other unclassified herpesviruses        |                     |               |            |          |               |            | 1/4                 | 5,00E-07      | 15         |
| <i>Papillomaviridae</i>                 |                     |               |            | 4/4      |               |            | 3/4                 |               |            |
| Bovine papillomaviruses                 |                     |               |            | 2/4      | 3E-49-4E-13   | 2-42       | 3/4                 | 3E-47-6E-26   | 4-89       |
| Human papillomaviruses                  |                     |               |            | 3/4      | 9E-18-9E-7    | 2-24       | 1/4                 | 7,00E-25      | 41         |
| Cervus elaphus papillomaviruses         |                     |               |            | 2/4      | 3E-8-4E-8     | 2-5        |                     |               |            |

|                                           |     |             |   |     |             |      |     |            |      |
|-------------------------------------------|-----|-------------|---|-----|-------------|------|-----|------------|------|
| Other papillomaviruses                    |     |             |   | 1/4 | 9E-12–5E-25 | 2–7  | 1/4 | 5,00E-08   | 19   |
| <i>Parvoviridae</i>                       | 1/3 |             |   |     |             |      | 4/4 |            |      |
| Red-crowned crane parvovirus              | 1/3 | 5,00E-15    | 8 |     |             |      | 4/4 | 2E-16–3E-9 | 9–28 |
| <i>Picobirnaviridae</i>                   | 1/3 |             |   |     |             |      |     |            |      |
| Human picobirnavirus                      | 1/3 | 4,00E-50    | 4 | 1/4 | 2,00E-61    | 4    |     |            |      |
| Lysoka partiti-like virus                 |     |             |   | 1/4 | 6,00E-07    | 4    |     |            |      |
| <i>Picornavirales (Unclassified)</i>      | 1/3 |             |   | 1/4 |             |      |     |            |      |
| Posavirus 1                               | 1/3 | 3,00E-11    | 2 | 1/4 | 1,00E-07    | 3    |     |            |      |
| <i>Polyomaviridae</i>                     |     |             |   |     |             |      | 1/4 |            |      |
| Human polyomavirus 12                     |     |             |   |     |             |      | 1/4 | 4,00E-06   | 6    |
| Miniopterus schreibersii polyomavirus 1   |     |             |   |     |             |      | 1/4 | 3,00E-06   | 5    |
| Dolphin polyomavirus 1                    |     |             |   |     |             |      | 1/4 | 6,00E-14   | 4    |
| Other Polyomaviruses                      |     |             |   |     |             |      | 1/4 | 6,00E-14   | 13   |
| <i>Reoviridae</i>                         |     |             |   |     |             |      |     |            |      |
| Bluetongue virus                          |     |             |   | 1/4 | 2,00E-07    | 2    |     |            |      |
| Porcine rotavirus                         |     |             |   | 1/4 | 2,00E-28    | 2    |     |            |      |
| <i>Small circular DNA viruses</i>         |     |             |   |     |             |      |     |            |      |
| <i>Genomoviridae</i>                      |     |             |   |     |             |      |     |            |      |
| Lynx canadensis faeces assoc. virus       |     |             |   | 1/4 | 3,00E-09    | 2    |     |            |      |
| Pteropus assoc. gemycircularvirus 3       | 1/3 | 1,00E-12    | 2 |     |             |      |     |            |      |
| Sewage assoc. Gemycircularvirus 7b        | 1/3 | 7,00E-06    | 2 |     |             |      |     |            |      |
| Spider assoc. circular virus 1            |     |             |   | 1/4 | 2,00E-67    | 10   |     |            |      |
| <i>Circoviridae</i>                       |     |             |   |     |             |      |     |            |      |
| Porcine circovirus 3                      |     |             |   | 2/4 | 1E-29–4E-29 | 2–11 |     |            |      |
| Other circoviruses                        |     |             |   | 1/4 | 4,00E-10    | 6    |     |            |      |
| CRESS virus sp.                           |     |             |   | 2/4 | 4E-10–6E-9  | 2–3  |     |            |      |
| <i>Smacoviridae</i>                       |     |             |   |     |             |      |     |            |      |
| Lemur assoc. porprismacovirus 1           |     |             |   | 1/4 | 3,00E-26    | 3    |     |            |      |
| Macaque feces assoc. virus 2              |     |             |   | 1/4 | 3,00E-07    | 2    |     |            |      |
| Other smacoviruses                        |     |             |   | 1/4 | 2,00E-14    | 4    |     |            |      |
| <i>Unidentified ssDNA viruses</i>         |     |             |   | 1/4 |             |      |     |            |      |
| Unidentified circular ssDNA virus         |     |             |   | 1/4 | 7,00E-57    | 4    |     |            |      |
| <i>Unclassified environmental viruses</i> | 2/3 |             |   |     |             |      |     |            |      |
| Uncultured viruses                        | 2/3 | 3E-44–3E-60 | 4 |     |             |      |     |            |      |
| <i>Unclassified RNA viruses</i>           |     |             |   | 1/4 |             |      |     |            |      |
| Hainan astro-like virus 2                 |     |             |   | 1/4 | 7,00E-08    | 40   |     |            |      |
| Hubei diptera virus 20                    |     |             |   | 1/4 | 2,00E-07    | 2    |     |            |      |

**Supplementary Table S9.** Viral blastn hits from rectal swabs collected from semi-domesticated Eurasian tundra reindeer herds in Finland during Dec-Feb 2016-17. Reindeer were sampled in herds from three regions (A, B, C).

| Virus | Region A 14-12-2016 |               |            | Region B 30-01-2017 |               |            | Region C 02-02-2017 |               |            |
|-------|---------------------|---------------|------------|---------------------|---------------|------------|---------------------|---------------|------------|
|       | Pools               | e-value (min) | Read count | Pools               | e-value (min) | Read count | Pools               | e-value (min) | Read count |

|                                           |     |             |      |     |             |      |     |             |      |
|-------------------------------------------|-----|-------------|------|-----|-------------|------|-----|-------------|------|
| <i>Alloherpesviridae</i>                  |     |             |      | 1/4 |             |      |     |             |      |
| Anguillid herpesvirus                     |     |             |      | 1/4 | 9,00E-23    | 2    |     |             |      |
| <i>Arenaviridae</i>                       | 1/4 |             |      | 4/4 |             |      | 1/4 |             |      |
| Lassa mammarenavirus                      | 1/4 | 1,00E-08    | 4    | 4/4 | 2E-13–1E-9  | 3–14 | 1/4 | 3E-11–1E-8  | 5–16 |
| <i>Astroviridae</i>                       |     |             |      | 1/4 |             |      | 1/4 |             |      |
| Bovine astrovirus                         |     |             |      | 1/4 | 1,00E-46    | 8    | 1/4 | 2,00E-17    | 2    |
| Porcine astrovirus 2                      |     |             |      | 1/4 | 9,00E-20    | 6    |     |             |      |
| Other astroviruses                        |     |             |      | 1/4 | 6,00E-16    | 4    |     |             |      |
| <i>Flaviviridae</i>                       | 4/4 |             |      | 4/4 |             |      | 3/4 |             |      |
| Iguape virus                              | 4/4 | 3E-70–5E-61 | 8–42 | 4/4 | 7E-73–1E-41 | 2–32 | 3/4 | 4E-69–4E-62 | 3–42 |
| <i>Parvoviridae</i>                       | 4/4 |             |      | 4/4 |             |      | 4/4 |             |      |
| Red-crowned crane parvovirus              | 4/4 | 9E-10–7E-7  | 2–3  | 4/4 | 1E-14–3E-11 | 7–9  | 4/4 | 2E-13–5E-8  | 2–8  |
| Cutavirus                                 |     |             |      | 1/4 | 2,00E-09    | 2    |     |             |      |
| <i>Picobirnaviridae</i>                   |     |             |      |     |             |      | 1/4 |             |      |
| Dromedary picobirnavirus                  |     |             |      | 1/4 | 3,00E-07    | 2    |     |             |      |
| Lysoka partiti-like virus                 |     |             |      | 1/4 | 2,00E-10    | 4    | 1/4 | 4,00E-30    | 2    |
| Marmot picobirnavirus                     |     |             |      |     |             |      | 1/4 | 9,00E-10    | 2    |
| Picobirnavirus sp.                        |     |             |      |     |             |      | 1/4 | 2,00E-14    | 2    |
| <i>Picornaviridae</i>                     |     |             |      | 1/4 |             |      |     |             |      |
| Rodent hepatovirus A                      |     |             |      | 1/4 | 2,00E-51    | 14   |     |             |      |
| Human hepatovirus A                       |     |             |      | 1/4 | 8,00E-19    | 9    |     |             |      |
| Woodchuck hepatovirus A                   |     |             |      | 1/4 | 2,00E-35    | 6    |     |             |      |
| Other hepatoviruses A                     |     |             |      | 1/4 | 1,00E-33    | 4    |     |             |      |
| <i>Poxviridae</i>                         | 1/4 |             |      |     |             |      |     |             |      |
| Orf virus                                 | 1/4 | 3,00E-44    | 2    |     |             |      |     |             |      |
| <i>Small circular DNA viruses</i>         |     |             |      |     |             |      |     |             |      |
| <i>Smacoviridae</i>                       |     |             |      |     |             |      | 1/4 |             |      |
| Cattle blood-assoc. circular virus        |     |             |      | 1/4 | 1,00E-54    | 27   | 1/4 | 7,00E-13    | 19   |
| Chimpanzee assoc. porprismacovirus        |     |             |      |     |             |      | 1/4 | 4,00E-06    | 3    |
| Camel assoc. porprismacovirus             |     |             |      | 2/4 | 8E-88–3E-78 | 4–7  |     |             |      |
| Other smacoviruses                        |     |             |      | 1/4 | 1,00E-72    | 9    |     |             |      |
| <i>Genomoviridae</i>                      |     |             |      | 1/4 |             |      |     |             |      |
| Cattle plasma-assoc. gemycircular-virus   |     |             |      | 1/4 | 3,00E-45    | 9    |     |             |      |
| Gila monster-assoc. gemycircularvirus     |     |             |      | 1/4 | 6,00E-66    | 3    |     |             |      |
| <i>Unclassified ssDNA viruses</i>         |     |             |      |     |             |      |     |             |      |
| Unidentified circular ssDNA virus         |     |             |      |     |             |      | -   | 7,00E-12    | 6    |
| <i>Unclassified environmental viruses</i> |     |             |      | 1/4 |             |      |     |             |      |
| Uncultured viruses                        |     |             |      | 1/4 | 5,00E-12    | 2    |     |             |      |
| <i>Unclassified viruses</i>               |     |             |      | 1/4 |             |      |     |             |      |
| Pecovirus                                 |     |             |      | 1/4 | 1,00E-08    | 2    |     |             |      |

**Supplementary Table S10.** Viral blastn hits from rectal swabs collected from semi-domesticated Eurasian tundra reindeer herds in Finland during Oct-Nov 2017. Reindeer were sampled in herds from three regions (A, B, C).

| Virus                                         | Region A 18-11-2017 |               |            | Region B 26-10-2017 |               |            | Region C 30-10-2017 |               |            |
|-----------------------------------------------|---------------------|---------------|------------|---------------------|---------------|------------|---------------------|---------------|------------|
|                                               | Pools               | e-value (min) | Read count | Pools               | e-value (min) | Read count | Pools               | e-value (min) | Read count |
| <i>Adenoviridae</i>                           |                     |               |            |                     |               |            | 1/4                 |               |            |
| Bovine adenoviruses                           |                     |               |            |                     |               |            | 1/4                 | 3,00E-48      | 129        |
| Simian adenoviruses                           |                     |               |            |                     |               |            | 1/4                 | 1,00E-23      | 88         |
| Porcine adenoviruses                          |                     |               |            |                     |               |            | 1/4                 | 7,00E-76      | 69         |
| Bat adenoviruses                              |                     |               |            |                     |               |            | 1/4                 | 3,00E-31      | 30         |
| Human adenoviruses                            |                     |               |            |                     |               |            | 1/4                 | 2,00E-27      | 21         |
| Other adenoviruses                            |                     |               |            |                     |               |            | 1/4                 | 3,00E-49      | 29         |
| <i>Parvoviridae</i>                           |                     |               |            |                     |               |            | 1/4                 |               |            |
| Red-crowned crane parvovirus                  |                     |               |            |                     |               |            | 1/4                 | 1,00E-14      | 2          |
| <i>Picobirnaviridae</i>                       | 3/4                 |               |            | 2/4                 |               |            |                     |               |            |
| Human picobirnavirus (pseudogene)             | 3/4                 | 3E-64–5E-15   | 2–13       | 2/4                 | 9E-50–1E-42   | 2–3        |                     |               |            |
| <i>Small circular DNA viruses</i>             |                     |               |            |                     |               |            |                     |               |            |
| <i>Genomoviridae</i>                          |                     |               |            | 1/4                 |               |            |                     |               |            |
| Momordica charantia assoc. Gemycircular-virus |                     |               |            |                     |               |            | 1/4                 | 3,00E-81      | 1          |
| Pteropus assoc. gemycircularvirus 3           |                     |               |            |                     |               |            | 1/4                 | 2,00E-89      | 1          |
| Tubeweb spider assoc. circular virus 1        |                     |               |            | 1/4                 | 5,00E-34      | 2          |                     |               |            |
| <i>Smacoviridae</i>                           |                     |               |            | 1/4                 |               |            |                     |               |            |
| Sheep faeces assoc. Smacovirus 1              |                     |               |            | 1/4                 | 6,00E-95      | 2          |                     |               |            |
| <i>Unclassified environmental viruses</i>     |                     |               |            |                     |               |            | 1/4                 |               |            |
| Uncultured viruses                            |                     |               |            |                     |               |            | 1/4                 | 6,00E-29      | 2          |

**Supplementary Table S11.** Viral blastn hits from nasal swabs collected from semi-domesticated Eurasian tundra reindeer herds in Finland during Dec-Feb 2016-17. Reindeer were sampled in herds from three regions (A, B and C).

| Virus                         | Region A 14-12-2016 |               |            | Region B 30-01-2017 |               |            | Region C 02-02-2017 |               |            |
|-------------------------------|---------------------|---------------|------------|---------------------|---------------|------------|---------------------|---------------|------------|
|                               | Pools               | e-value (min) | Read count | Pools               | e-value (min) | Read count | Pools               | e-value (min) | Read count |
| <i>Adenoviridae</i>           | 1/4                 |               |            |                     |               |            |                     |               |            |
| Bovine adenovirus 3           | 1/4                 | 2,00E-94      | 14         |                     |               |            |                     |               |            |
| Other adenoviruses            | 1/4                 | 5,00E-65      | 4          |                     |               |            |                     |               |            |
| <i>Alloherpesviridae</i>      | 4/4                 |               |            |                     |               |            | 1/7                 |               |            |
| Anguillid herpesvirus 1       | 4/4                 | 5E-20–6E-14   | 3-5        |                     |               |            | 1/7                 | 1,00E-16      | 3          |
| <i>Arenaviridae</i>           |                     |               |            |                     |               |            |                     |               |            |
| Guanarito mammarenavirus      |                     |               |            |                     |               |            | 4/7                 | 6E-52–2E-38   | 4–268      |
| Lassa mammarenavirus          |                     |               |            |                     |               |            | 4/7                 | 1E-78–5E-65   | 2–38       |
| <i>Flaviviridae</i>           | 1/4                 |               |            |                     |               |            |                     |               |            |
| Bovine viral diarrhea virus 1 |                     |               |            |                     |               |            | 2/7                 | 3E-99–6E-33   | 2-3        |
| Dengue virus                  | 1/4                 | 3,00E-17      | 3          |                     |               |            | 1/7                 | 1,00E-09      | 3          |

|                            |     |          |    |     |          |   |     |             |      |
|----------------------------|-----|----------|----|-----|----------|---|-----|-------------|------|
| Iguape virus               |     |          |    |     |          |   | 4/7 | 1E-63–3E-35 | 2-11 |
| <i>Herpesviridae</i>       | 1/4 |          |    | 1/4 |          |   | 3/7 |             |      |
| <i>Alphaherpesvirinae</i>  |     |          |    |     |          |   | 1/7 |             |      |
| Various alphaherpesviruses |     |          |    |     |          |   | 1/7 | 9,00E-19    | 3    |
| <i>Betaherpesvirinae</i>   |     |          |    |     |          |   | 1/7 |             |      |
| Panine herpesvirus 2       |     |          |    |     |          |   | 1/7 | 5,00E-08    | 4    |
| <i>Gammapherpesvirinae</i> | 1/4 |          |    | 1/4 |          |   |     |             |      |
| Ovine herpesvirus 2        | 1/4 | 2,00E-39 | 54 |     |          |   | 2/7 | 1E-53–1E-21 | 5–15 |
| Human herpesvirus 4        |     |          |    | 1/4 | 6,00E-06 | 1 |     |             |      |
| Bovine herpesvirus 6       | 1/4 | 6,00E-39 | 51 | 1/4 | 2,00E-08 | 1 | 2/7 | 2E-38–2E-20 | 7–11 |
| Alcelaphine herpesvirus 1  | 1/4 | 2,00E-46 | 43 |     |          |   | 2/7 | 8E-44–7E-38 | 7–9  |
| Alcelaphine herpesvirus 2  | 1/4 | 3,00E-55 | 46 |     |          |   | 1/7 | 5,00E-59    | 5    |
| Reindeer gammaherpesvirus  |     |          |    |     |          |   | 1/7 | 1,00E-98    | 2    |
| Other gammaherpesviruses   | 1/4 | 1,00E-40 | 27 |     |          |   | 3/7 | 2E-20–6E-6  | 1–5  |
| <i>Paramyxoviridae</i>     |     |          |    |     |          |   | 2/7 |             |      |
| Human respirovirus         |     |          |    |     |          |   | 2/7 | 6E-26–4E-16 | 2–6  |
| <i>Parvoviridae</i>        |     |          |    |     |          |   | 1/7 |             |      |
| Mink bocavirus             |     |          |    |     |          |   | 1/7 | 5,00E-42    | 2    |
| <i>Pneumoviridae</i>       | 1/4 |          |    |     |          |   |     |             |      |
| Swine pneumovirus 57       | 1/4 | 2,00E-07 | 2  |     |          |   |     |             |      |
| <i>Poxviridae</i>          |     |          |    | 1/4 |          |   |     |             |      |
| Orf virus                  |     |          |    | 1/4 | 8,00E-51 | 2 |     |             |      |

**Supplementary Table S12.** Viral blastn hits from nasal swabs collected from semi-domesticated Eurasian tundra reindeer herds in Finland during Oct-Nov 2017. Reindeer were sampled in herds from three regions (A, B, C).

| Virus                         | Region A 18-11-2017 |               |            | Region B 26-10-2017 |               |            | Region C 30-10-2017 |               |            |
|-------------------------------|---------------------|---------------|------------|---------------------|---------------|------------|---------------------|---------------|------------|
|                               | Pools               | e-value (min) | Read count | Pools               | e-value (min) | Read count | Pools               | e-value (min) | Read count |
| <i>Arenaviridae</i>           |                     |               |            |                     |               |            | 1/4                 |               |            |
| Guanarito mammarenavirus      | 1/4                 | 1,00E-37      | 2          |                     |               |            | 1/4                 | 3,00E-17      | 2          |
| Lassa mammarenavirus          | 1/4                 | 1,00E-09      | 2          |                     |               |            |                     |               |            |
| <i>Flaviviridae</i>           |                     |               |            | 1/4                 |               |            | 1/4                 |               |            |
| Bovine viral diarrhea virus 1 |                     |               |            | 1/4                 | 7,00E-38      | 3          |                     |               |            |
| Dengue virus                  |                     |               |            |                     |               |            | 1/4                 | 3,00E-11      | 2          |
| Iguape virus                  |                     |               |            |                     |               |            |                     |               |            |
| <i>Herpesviridae</i>          |                     |               |            |                     |               |            |                     |               |            |
| <i>Alphaherpesvirinae</i>     | 1/4                 |               |            | 2/4                 |               |            | 1/4                 |               |            |
| Cercopithecine herpesvirus 1  | 1/4                 | 4,00E-06      | 2          | 1/4                 | 4,00E-06      | 1          |                     |               |            |
| Felid herpesvirus 1           | 1/4                 | 7,00E-07      | 3          | 1/4                 | 4,00E-09      | 1          |                     |               |            |
| Human herpesvirus 3           |                     |               |            |                     |               |            | 1/4                 | 5,00E-06      | 1          |
| Suid herpesvirus 1            |                     |               |            |                     |               |            | 1/4                 | 9,00E-23      | 1          |
| <i>Betaherpesvirinae</i>      |                     |               |            |                     |               |            | 1/4                 |               |            |
| Human herpesvirus 7           |                     |               |            |                     |               |            | 1/4                 | 4,00E-22      | 1          |

|                                   |     |          |     |          |     |             |     |
|-----------------------------------|-----|----------|-----|----------|-----|-------------|-----|
| Macaca nemestrina herpesvirus 7   |     |          |     |          | 1/4 | 1,00E-22    | 1   |
| <i>Gammaherpesvirinae</i>         | 1/4 |          | 1/4 |          |     |             |     |
| Alcelaphine herpesvirus 1         |     |          | 1/4 | 3,00E-43 | 6   |             |     |
| Alcelaphine herpesvirus 2         |     |          | 1/4 | 3,00E-37 | 5   |             |     |
| Ovine herpesvirus 2               |     |          | 1/4 | 9,00E-28 | 4   |             |     |
| Saimiriine herpesvirus 2          | 1/4 | 2,00E-15 | 2   |          |     |             |     |
| Other gammaherpesviruses          |     |          | 1/4 | 8,00E-12 | 8   |             |     |
| <i>Papillomaviridae</i>           |     |          |     |          |     |             |     |
| Bovine papillomavirus             |     |          |     |          | 1/4 | 6,00E-09    | 2   |
| Bovine papillomavirus 16          |     |          |     |          | 1/4 | 2,00E-50    | 1   |
| <i>Picobirnaviridae</i>           | 1/4 |          |     |          | 2/4 |             |     |
| Human picobirnavirus (pseudogene) | 1/4 | 7,00E-57 | 2   |          | 2/4 | 4E-53–1E-44 | 3–4 |

**Supplementary Table S13.** Viral blastn hits from rectal swabs collected from wild Eurasian tundra reindeer in Iceland in August 2017 and August 2018. Swab samples were collected during the hunting season and from all reindeer hunting districts.

| Virus                            | Region A Aug-17 |               |            | Region A Aug-18 |               |            |
|----------------------------------|-----------------|---------------|------------|-----------------|---------------|------------|
|                                  | Pools           | e-value (min) | Read count | Pools           | e-value (min) | Read count |
| <i>Alloherpesviridae</i>         |                 |               |            | 1/4             |               |            |
| Cyprinid herpesvirus 3           |                 |               |            | 1/4             | 1,00E-14      | 3          |
| <i>Arenaviridae</i>              | 2/3             |               |            | 1/4             |               |            |
| Guanarito mammarenavirus         | 2/3             | 4E-39–4E-35   | 2–4        |                 |               |            |
| Lassa mammarenavirus             |                 |               |            | 1/4             | 5E-40–6E-13   | 5–32       |
| <i>Flaviviridae</i>              |                 |               |            |                 |               |            |
| Bovine viral diarrhea virus 1    | 1/3             | 2,00E-19      | 1          |                 |               |            |
| Dengue virus 1                   | 1/3             | 2,00E-14      | 7          |                 |               |            |
| <i>Herpesviridae</i>             |                 |               |            | 2/4             |               |            |
| <i>Alphaherpesvirinae</i>        |                 |               |            |                 |               |            |
| Bovine herpesvirus type 1        |                 |               |            | 1/4             | 6,00E-06      | 1          |
| Equid herpesvirus 4              |                 |               |            | 2/4             | 5E-8–7E-6     | 1          |
| Human alphaherpesvirus 1         |                 |               |            | 2/4             | 1E-20–1E-9    | 1–2        |
| Macacine alphaherpesvirus 1      |                 |               |            | 2/4             | 5E-27–2E-20   | 1–7        |
| Suid herpesvirus 1               |                 |               |            | 2/4             | 4E-15–7E-13   | 1          |
| <i>Gammaherpesvirinae</i>        |                 |               |            |                 |               |            |
| Human herpesvirus 4              |                 |               |            | 2/4             | 6E-20–4E-10   | 5–9        |
| Human herpesvirus 8              |                 |               |            | 1/4             | 6,00E-07      | 1          |
| Macaca nemestrina rhadinovirus 2 |                 |               |            | 1/4             | 7,00E-13      | 1          |
| <i>Parvoviridae</i>              |                 |               |            | 4/4             |               |            |
| Bocaparvovirus sp.               |                 |               |            | 4/4             | 8E-14–1E-6    | 5–18       |
| Red-crowned crane parvovirus     |                 |               |            | 3/4             | 5E-15–9E-12   | 17–21      |
| <i>Peribunyaviridae</i>          |                 |               |            |                 |               |            |
| Ngari virus                      |                 |               |            | 2/4             | 1,00E-26      | 2          |
| Orthobunyavirus sp.              |                 |               |            | 1/4             | 1,00E-09      | 2          |



|                                               |     |             |        |
|-----------------------------------------------|-----|-------------|--------|
| <i>Picobirnaviridae</i>                       | 1/4 |             |        |
| Chicken picobirnavirus                        | 1/4 | 2,00E-08    | 2      |
| <i>Picornavirales (Unclassified)</i>          | 1/4 |             |        |
| Posavirus 1                                   | 1/4 | 5,00E-08    | 2      |
| <i>Pneumoviridae</i>                          | 1/4 |             |        |
| Swine pneumovirus 57                          | 1/4 | 2,00E-07    | 8      |
| <i>Poxviridae</i>                             | 1/4 |             |        |
| Akhmeta virus                                 | 1/4 | 5,00E-06    | 2      |
| Small circular DNA viruses                    |     |             |        |
| <i>Circoviridae</i>                           |     |             |        |
| CRESS virus sp                                | 2/4 | 2E-47–4E-22 | 33–253 |
| Feline cyclovirus                             | 1/4 | 1,00E-06    | 11     |
| <i>Genomoviridae</i>                          |     |             |        |
| Alces alces faeces assoc. genomovirus         | 2/4 | 3E-11–3E-6  | 2–8    |
| Giant panda assoc. gemycircularvirus          | 1/4 | 1,00E-97    | 3      |
| Insect-assoc. genomoviruses                   | 1/4 | 3,00E-49    | 15     |
| Lama faeces assoc. gemycircularvirus 21       | 2/4 | 2E-38–2E-26 | 4      |
| Lupine feces-assoc. gemycircularvirus 1       | 1/4 | 6,00E-12    | 2      |
| Lynx faeces assoc. genomovirus                | 1/4 | 5,00E-16    | 2      |
| Sewage-assoc. gemycircularviruses             | 1/4 | 2,00E-58    | 17     |
| <i>Smacoviridae</i>                           |     |             |        |
| Bovine faeces assoc. smacoviruses             | 3/4 | 2E-50–1E-6  | 2–55   |
| Odonata-assoc. smacoviruses                   | 2/4 | 3E-21–5E-8  | 6–197  |
| Porcine assoc. smacoviruses                   | 3/4 | 8E-62–1E-35 | 2–378  |
| Sheep/goat faeces assoc. smacoviruses         | 3/4 | 4E-28–5E-15 | 15–22  |
| Other smacoviruses                            | 3/4 | 2E-75–1E-16 | 2–64   |
| <i>Unclassified ssDNA viruses</i>             | 1/4 |             |        |
| Bovine faeces assoc. circular DNA             | 1/4 | 6,00E-33    | 132    |
| Cyanoramphus nest assoc. circular K DNA virus | 1/4 | 4,00E-16    | 2      |
| Rodent stool-assoc. circular genome virus     | 1/4 | 5,00E-07    | 71     |
| Unidentified circular ssDNA virus             | 1/4 | 2,00E-16    | 174    |

**Supplementary Table S14.** Viral blastn hits from nasal swabs collected from wild Eurasian tundra reindeer in Iceland in August 2017 and August 2018. Swab samples were collected during the hunting season and from all reindeer hunting districts.

| Virus                         | Pools | Region A Aug-17 |            | Pools | Region A Aug-18 |            |
|-------------------------------|-------|-----------------|------------|-------|-----------------|------------|
|                               |       | e-value (min)   | Read count |       | e-value (min)   | Read count |
| <i>Arenaviridae</i>           | 8/8   |                 |            | 5/5   |                 |            |
| Guanarito mammarenavirus      | 8/8   | 6E-75–7E-66     | 10–72      |       |                 |            |
| Lassa mammarenavirus          | 8/8   | 1E-53–5E-46     | 36–235     | 5/5   | 5E-75–1E-10     | 2–31       |
| <i>Flaviviridae</i>           | X     |                 |            | X     |                 |            |
| Bovine viral diarrhea virus 1 | 2/8   | 7E-38–2E-19     | 1          |       |                 |            |
| Bovine viral diarrhea virus 2 | 1/8   | 3,00E-87        | 1          |       |                 |            |

|                                         |     |              |     |     |             |       |
|-----------------------------------------|-----|--------------|-----|-----|-------------|-------|
| Iguape virus                            | 5/8 | 4E-54–3E-23  | 2–8 | X   | 1E-63–3E-42 | 2–15  |
| <i>Herpesviridae</i>                    | X   |              |     |     |             |       |
| <i>Alphaherpesvirinae</i>               | X   |              |     |     |             |       |
| Macacine alphaherpesvirus 1             | 1/8 | 2,00E-08     | 2   |     |             |       |
| Suid herpesvirus 1                      | 3/8 | 7E-38–4E-14  | 2   |     |             |       |
| <i>Betaherpesvirinae</i>                |     |              |     | 1/5 |             |       |
| Elephant endotheliotropic herpesvirus 4 |     |              |     | 1/5 | 5,00E-08    | 1     |
| Human herpesvirus 4                     |     |              |     | 1/5 | 2,00E-06    | 1     |
| Human betaherpesvirus 6A                |     |              |     | 1/5 | 6,00E-07    | 1     |
| <i>Coronaviridae</i>                    |     |              |     | 1/5 |             |       |
| Python nidovirus                        |     |              |     | 1/5 | 1,00E-40    | 4     |
| <i>Papillomaviridae</i>                 | X   |              |     |     |             |       |
| Bovine papillomavirus (various types)   | 1/8 | 6,00E-58     | 12  |     |             |       |
| Human papillomavirus (various types)    | 2/8 | 1E-147–1E-17 | 2–6 |     |             |       |
| Rangifer papillomavirus                 | 1/8 | 7,00E-19     | 1   |     |             |       |
| <i>Paramyxoviridae</i>                  | 1/8 |              |     |     |             |       |
| Human respirovirus 1                    | 1/8 | 1,00E-23     | 2   |     |             |       |
| <i>Parvoviridae</i>                     |     |              |     | 5/5 |             |       |
| Red-crowned crane parvovirus            |     |              |     | 5/5 | 1E-14–8E-12 | 26–44 |
| <i>Peribunyaviridae</i>                 | 3/8 |              |     | 2/5 |             |       |
| Orthobunyavirus sp.                     | 3/8 | 1E-22–6E-13  | 2–4 | 2/5 | 2,00E-22    | 2–4   |
| <i>Picobirnaviridae</i>                 |     |              |     | 1/5 |             |       |
| Lysoka partiti-like virus               |     |              |     | 1/5 | 4,00E-09    | 2     |
| <i>Picornavirales (Unclassified)</i>    |     |              |     | 1/5 |             |       |
| Posavirus 1                             |     |              |     | 1/5 | 6,00E-07    | 2     |
| <i>Poxviridae</i>                       |     |              |     |     |             |       |
| Goat poxvirus                           | 1/8 | 8,00E-06     | 2   |     |             |       |
| Shearwaterpoxvirus                      | 1/8 | 7,00E-33     | 4   |     |             |       |
| Small circular DNA viruses              | 1/8 |              |     | 1/5 |             |       |
| <i>Circoviridae</i>                     | 1/8 |              |     | 1/5 |             |       |
| CRESS virus sp                          |     |              |     | 1/5 | 1,00E-20    | 2     |
| Feline cyclovirus                       | 1/8 | 8,00E-06     | 2   |     |             |       |

**Supplementary Table S15.** Viral blastn hits from rectal swabs collected from semi-domesticated Eurasian tundra reindeer herds in Yakutia, Russia, in December 2017 and November 2019. Reindeer were sampled in herds from three regions (A, B, C).

| Virus                    | Region A 12-2017 |               |            | Region B 11-2019 |               |            | Region C 11-2019 |               |            |
|--------------------------|------------------|---------------|------------|------------------|---------------|------------|------------------|---------------|------------|
|                          | Pools            | e-value (min) | Read count | Pools            | e-value (min) | Read count | Pools            | e-value (min) | Read count |
| <i>Arenaviridae</i>      | 1/1              |               |            |                  |               |            |                  |               |            |
| Guanarito mammarenavirus | 1/1              | 2,00E-50      | 55         |                  |               |            |                  |               |            |
| Lassa mammarenavirus     | 1/1              | 9,00E-43      | 11         |                  |               |            |                  |               |            |
| Luna mammarenavirus      | 1/1              | 1,00E-33      | 1          |                  |               |            |                  |               |            |
| <i>Flaviviridae</i>      | 1/1              |               |            | 1/4              |               |            |                  |               |            |

|                                           |     |          |    |     |             |      |     |             |     |
|-------------------------------------------|-----|----------|----|-----|-------------|------|-----|-------------|-----|
| Iguape virus                              | 1/1 | 9,00E-36 | 2  | 1/4 | 2,00E-65    | 12   | 1/4 | 2,00E-44    | 6   |
| Dengue virus                              |     |          |    |     |             |      | 1/4 | 3,00E-11    | 5   |
| <i>Herpesviridae</i>                      |     |          |    |     |             |      |     |             |     |
| <i>Alphaherpesvirinae</i>                 |     |          |    | 1/4 |             |      |     |             |     |
| Macacine alphaherpesvirus                 |     |          |    | 1/4 | 2,00E-06    | 2    |     |             |     |
| <i>Betaherpesvirinae</i>                  |     |          |    | 1/4 |             |      |     |             |     |
| Human betaherpesvirus 6B                  |     |          |    | 1/4 | 2,00E-11    | 2    |     |             |     |
| <i>Parvoviridae</i>                       |     |          |    |     |             |      | 1/4 |             |     |
| Porcine bocavirus                         | 1/1 | 1,00E-10 | 2  |     |             |      |     |             |     |
| Red-crowned crane parvovirus              | 1/1 | 6,00E-07 | 2  |     |             |      | 1/4 | 4,00E-10    | 4   |
| <i>Peribunyaviridae</i>                   |     |          |    |     |             |      |     |             |     |
| Orthobunyavirus sp.                       | 1/1 | 1,00E-22 | 2  |     |             |      |     |             |     |
| <i>Picobirnaviridae</i>                   |     |          |    |     |             |      |     |             |     |
| Dromedary picobirnavirus                  |     |          |    | 3/4 | 8E-80–9E-46 | 2–4  | 2/4 | 6E-55–6E-27 | 2–5 |
| Human picobirnavirus                      |     |          |    | 1/4 | 8E-80–9E-46 | 2    |     |             |     |
| Macaque picobirnavirus                    |     |          |    | 1/4 | 2,00E-47    | 2    | 2/4 | 9E-56–4E-47 | 1–5 |
| Marmot picobirnavirus                     |     |          |    |     |             |      | 2/4 | 1E-72–8E-63 | 1–3 |
| Roe-deer picobirnavirus                   |     |          |    |     |             |      | 2/4 | 2E-29–7E-20 | 2   |
| Other picobirnavirus                      |     |          |    | 1/4 | 1,00E-08    | 2    | 3/4 | 1E-23–2E-13 | 4   |
| <i>Picornavirales (Unclassified)</i>      |     |          |    | 2/4 |             |      |     |             |     |
| Posavirus 1                               |     |          |    | 2/4 | 2E-8–5E-8   | 2–12 |     |             |     |
| <i>Picornaviridae</i>                     |     |          |    |     |             |      | 2/4 |             |     |
| Hedgehog hepatovirus                      | 1/1 | 1,00E-11 | 1  |     |             |      |     |             |     |
| Hepatitis A virus                         | 1/1 | 6,00E-77 | 10 |     |             |      |     |             |     |
| Porcine kobuvirus                         | 1/1 | 2,00E-42 | 2  | 2/4 | 2E-64–3E-43 | 4    |     |             |     |
| Rodent hepatovirus                        | 1/1 | 2,00E-58 | 2  |     |             |      |     |             |     |
| <i>Poxviridae</i>                         |     |          |    | 1/4 |             |      |     |             |     |
| Cowpoxvirus                               |     |          |    | 1/4 | 4,00E-06    | 2    |     |             |     |
| Fowlpoxvirus                              |     |          |    | 1/4 | 1,00E-06    | 2    |     |             |     |
| <i>Unclassified viruses</i>               |     |          |    |     |             |      | 1/4 |             |     |
| Beihai narna-like virus 7                 |     |          |    |     |             |      | 1/4 | 8,00E-11    | 23  |
| Porcine feces assoc. IAS virus like virus |     |          |    | 1/4 | 4,00E-21    | 2    |     |             |     |
| Statovirus D1                             |     |          |    | 1/4 | 3,00E-17    | 13   |     |             |     |
| Wenzhou narna-like virus 4                |     |          |    |     |             |      | 1/4 | 1,00E-07    | 8   |

**Supplementary Table S16.** Viral blastn hits from nasal swabs collected from semi-domesticated Eurasian tundra reindeer herds in Russia in December 2017 and November 2019. Reindeer were sampled in herds from three regions (A, B, C).

| Virus                    | Region A 12-2017 |               |            | Region B 11-2019 |               |            | Region C 11-2019 |               |            |
|--------------------------|------------------|---------------|------------|------------------|---------------|------------|------------------|---------------|------------|
|                          | Pools            | e-value (min) | Read count | Pools            | e-value (min) | Read count | Pools            | e-value (min) | Read count |
| <i>Arenaviridae</i>      |                  |               |            |                  |               |            |                  |               |            |
| Guanarito mammarenavirus | 1/1              | 1,00E-40      | 4          | 2/4              |               |            |                  |               |            |

|                                           |     |           |    |     |             |      |          |             |
|-------------------------------------------|-----|-----------|----|-----|-------------|------|----------|-------------|
| Lassa mammarynavirus                      | 1/1 | 3,00E-11  | 2  | 2/4 | 8E-23–5E-7  | 3–4  |          |             |
| <i>Flaviviridae</i>                       | 1/1 |           |    |     |             |      |          |             |
| Classical swine fever virus               | 1/1 | 2,00E-31  | 2  |     |             |      |          |             |
| Dengue virus                              |     |           |    |     |             | 1/4  | 6,00E-14 | 8           |
| Iguape virus                              |     |           |    | -   | 4E-69–2E-66 | 4–11 | 3/4      | 5E-54–4E-13 |
| <i>Herpesviridae</i>                      |     |           |    |     |             |      |          |             |
| <i>Alphaherpesvirinae</i>                 |     |           |    | 1/4 |             |      |          |             |
| Canine herpesvirus                        |     |           |    | 1/4 | 9,00E-08    | 2    |          |             |
| <i>Gammaherpesvirinae</i>                 |     |           |    | 1/4 |             |      |          |             |
| Alcelaphine herpesvirus 1                 |     |           |    | 1/4 | 1,00E-29    | 13   |          |             |
| Alcelaphine herpesvirus 2                 |     |           |    | 1/4 | 1,00E-19    | 5    |          |             |
| Bovine herpesvirus 6                      |     |           |    | 1/4 | 4,00E-28    | 11   |          |             |
| Microtus agrestis rhadinovirus 1          |     |           |    | 1/4 | 8,00E-11    | 2    |          |             |
| Ovine herpesvirus 2                       |     |           |    | 1/4 | 2,00E-11    | 4    |          |             |
| <i>Papillomaviridae</i>                   | 1/1 |           |    |     |             |      |          |             |
| Bovine papillomavirus 20                  | 1/1 | 8,00E-08  | 2  |     |             |      |          |             |
| Human papillomavirus (various types)      | 1/1 | 1,00E-143 | 6  |     |             |      |          |             |
| <i>Paramyxoviridae</i>                    |     |           |    |     |             | 1/4  |          |             |
| Human respirovirus 1                      |     |           |    |     |             | 1/4  | 8,00E-30 | 2           |
| <i>Parvoviridae</i>                       | 1/1 |           |    |     |             |      |          |             |
| Porcine bocavirus                         |     |           |    |     |             | 1/4  | 9,00E-10 | 4           |
| Red-crowned crane parvovirus              | 1/1 | 2,00E-08  | 2  |     |             | 1/4  | 2,00E-12 | 5           |
| <i>Peribunyaviridae</i>                   |     |           |    |     |             | 1/4  |          |             |
| Simbu orthobunyavirus                     |     |           |    |     |             | 1/4  | 2,00E-09 | 2           |
| <i>Picornavirales (Unclassified)</i>      |     |           |    | 1/4 |             |      |          |             |
| Posavirus 1                               |     |           |    | 1/4 | 2,00E-08    | 4    |          |             |
| <i>Picobirnaviridae</i>                   | 1/1 |           |    |     |             |      |          |             |
| Dromedary picobirnavirus                  |     |           |    | 2/4 | 7E-49–5E-34 | 2    |          |             |
| Human picobirnavirus                      |     |           |    | 2/4 | 8E-53–2E-7  | 1–9  |          |             |
| Human picobirnavirus pseudogene           | 1/1 | 3,00E-61  | 31 |     |             |      |          |             |
| Gorilla picobirnavirus                    |     |           |    | 2/4 | 2E-55–6E-25 | 1–9  |          |             |
| Other picobirnaviruses                    |     |           |    | 3/4 | 2E-55–2E-7  | 1–6  |          |             |
| <i>Picornaviridae</i>                     |     |           |    |     |             | 1/4  |          |             |
| Bovine rhinitis A                         |     |           |    |     |             | 1/4  | 8,00E-28 | 38          |
| Bovine rhinitis B                         |     |           |    |     |             | 1/4  | 2,00E-11 | 9           |
| Foot-and-mouth disease virus type A       |     |           |    |     |             | 1/4  | 1,00E-10 | 6           |
| <i>Unclassified viruses</i>               |     |           |    | X   |             |      |          |             |
| Porcine feces assoc. IAS virus like virus |     |           |    | 1/4 | 5,00E-13    | 2    |          |             |
| Statovirus D1                             |     |           |    | 2/4 | 4E-34–3E-16 | 8–25 |          |             |
